# 1 **The sequence of human ACE2 is suboptimal for binding** 2 **the S spike protein of SARS coronavirus 2**

3 **Erik Procko**

4 Department of Biochemistry, University of Illinois, Urbana IL 61801  
5 Email: coronavirus-research@illinois.edu

6 **SUMMARY. The rapid and escalating spread of SARS coronavirus 2 (SARS-CoV-2)**  
7 **poses an immediate public health emergency. The viral spike protein S binds ACE2**  
8 **on host cells to initiate molecular events that release the viral genome**  
9 **intracellularly. Soluble ACE2 inhibits entry of both SARS and SARS-2 coronaviruses**  
10 **by acting as a decoy for S binding sites, and is a candidate for therapeutic and**  
11 **prophylactic development. Using deep mutagenesis, variants of ACE2 are identified**  
12 **with increased binding to the receptor binding domain of S. Mutations are found**  
13 **across the interface, in the N90-glycosylation motif, and at buried sites where they**  
14 **are predicted to enhance folding and presentation of the interaction epitope. When**  
15 **single substitutions are combined, large increases in binding can be achieved. The**  
16 **mutational landscape offers a blueprint for engineering high affinity proteins and**  
17 **peptides that block receptor binding sites on S to meet this unprecedented**  
18 **challenge.**

19 In December, 2019, a novel zoonotic betacoronavirus closely related to bat coronaviruses  
20 spilled over to humans at the Huanan Seafood Market in the Chinese city of Wuhan (1, 2).  
21 The virus, called SARS-CoV-2 due to its similarities with the severe acute respiratory  
22 syndrome (SARS) coronavirus responsible for a smaller outbreak nearly two decades prior  
23 (3, 4), has since spread human-to-human rapidly across the world, precipitating  
24 extraordinary containment measures from governments (5). Stock markets have fallen,  
25 travel restrictions have been imposed, public gatherings canceled, and large numbers of  
26 people are self-isolating. These events are unlike any experienced in generations.  
27 Symptoms of coronavirus disease 2019 (COVID-19) range from mild to dry cough, fever,  
28 pneumonia and death, and SARS-CoV-2 is devastating among the elderly and other  
29 vulnerable groups (6, 7).

30 The S spike glycoprotein of SARS-CoV-2 binds angiotensin-converting enzyme 2 (ACE2) on  
31 host cells (2, 8-13). S is a trimeric class I viral fusion protein that is proteolytically  
32 processed into S1 and S2 subunits that remain noncovalently associated in a prefusion  
33 state (8, 11, 14). Upon engagement of ACE2 by a receptor binding domain (RBD) in S1 (15),  
34 conformational rearrangements occur that cause S1 shedding, cleavage of S2 by host  
35 proteases, and exposure of a fusion peptide adjacent to the S2' proteolysis site (14, 16-18).  
36 Favorable folding of S to a post-fusion conformation is coupled to host cell/virus  
37 membrane fusion and cytosolic release of viral RNA. Atomic contacts with the RBD are  
38 restricted to the protease domain of ACE2 (19, 20), and soluble ACE2 (sACE2) in which the  
39 neck and transmembrane domains are removed is sufficient for binding S and neutralizing  
40 infection (12, 21-24). In principle, the virus has limited potential to escape sACE2-

41 mediated neutralization without simultaneously decreasing affinity for native ACE2  
42 receptors, thereby attenuating virulence. Furthermore, fusion of sACE2 to the Fc region of  
43 human immunoglobulin can provide an avidity boost while recruiting immune effector  
44 functions and increasing serum stability, an especially desirable quality if intended for  
45 prophylaxis (23, 25), and sACE2 has proven safe in healthy human subjects (26) and  
46 patients with lung disease (27). Recombinant sACE2 has now been rushed into a clinical  
47 trial for COVID-19 in Guangdong province, China (Clinicaltrials.gov #NCT04287686), and  
48 peptide derivatives of ACE2 are also being explored as cell entry inhibitors (28).

49 Since human ACE2 has not evolved to recognize SARS-CoV-2 S, it was hypothesized that  
50 mutations may be found that increase affinity for therapeutic and diagnostic applications.  
51 The coding sequence of full length ACE2 with an N-terminal c-myc epitope tag was  
52 diversified to create a library containing all possible single amino acid substitutions at 117  
53 sites spanning the entire interface with S and lining the substrate-binding cavity. S binding  
54 is independent of ACE2 catalytic activity (23) and occurs on the outer surface of ACE2 (19,  
55 20), whereas angiotensin substrates bind within a deep cleft that houses the active site  
56 (29). Substitutions within the substrate-binding cleft of ACE2 therefore act as controls that  
57 are anticipated to have minimal impact on S interactions, yet may be useful for engineering  
58 out substrate affinity to enhance *in vivo* safety. It is important to note though that  
59 catalytically active protein may have desirable effects for replenishing lost ACE2 activity in  
60 COVID-19 patients in respiratory distress (30, 31).

61 The ACE2 library was transiently expressed in human Expi293F cells under conditions that  
62 typically yield no more than one coding variant per cell, providing a tight link between  
63 genotype and phenotype (32, 33). Cells were then incubated with a subsaturating dilution  
64 of medium containing the RBD of SARS-CoV-2 fused C-terminally to superfolder GFP  
65 (sfGFP: (34)) (Fig. 1A). Levels of bound RBD-sfGFP correlate with surface expression levels  
66 of myc-tagged ACE2 measured by dual color flow cytometry. Compared to cells expressing  
67 wild type ACE2 (Fig. 1C), many variants in the ACE2 library fail to bind RBD, while there  
68 appeared to be a smaller number of ACE2 variants with higher binding signals (Fig. 1D).  
69 Cells expressing ACE2 variants with high or low binding to RBD were collected by  
70 fluorescence-activated cell sorting (FACS), referred to as "nCoV-S-High" and "nCoV-S-Low"  
71 sorted populations, respectively. During FACS, fluorescence signal for bound RBD-sfGFP  
72 continuously declined, requiring the collection gates to be regularly updated to 'chase' the  
73 relevant populations. This is consistent with RBD dissociating over hours during the  
74 experiment. Reported affinities of RBD for ACE2 range from 1 to 15 nM (8, 10).

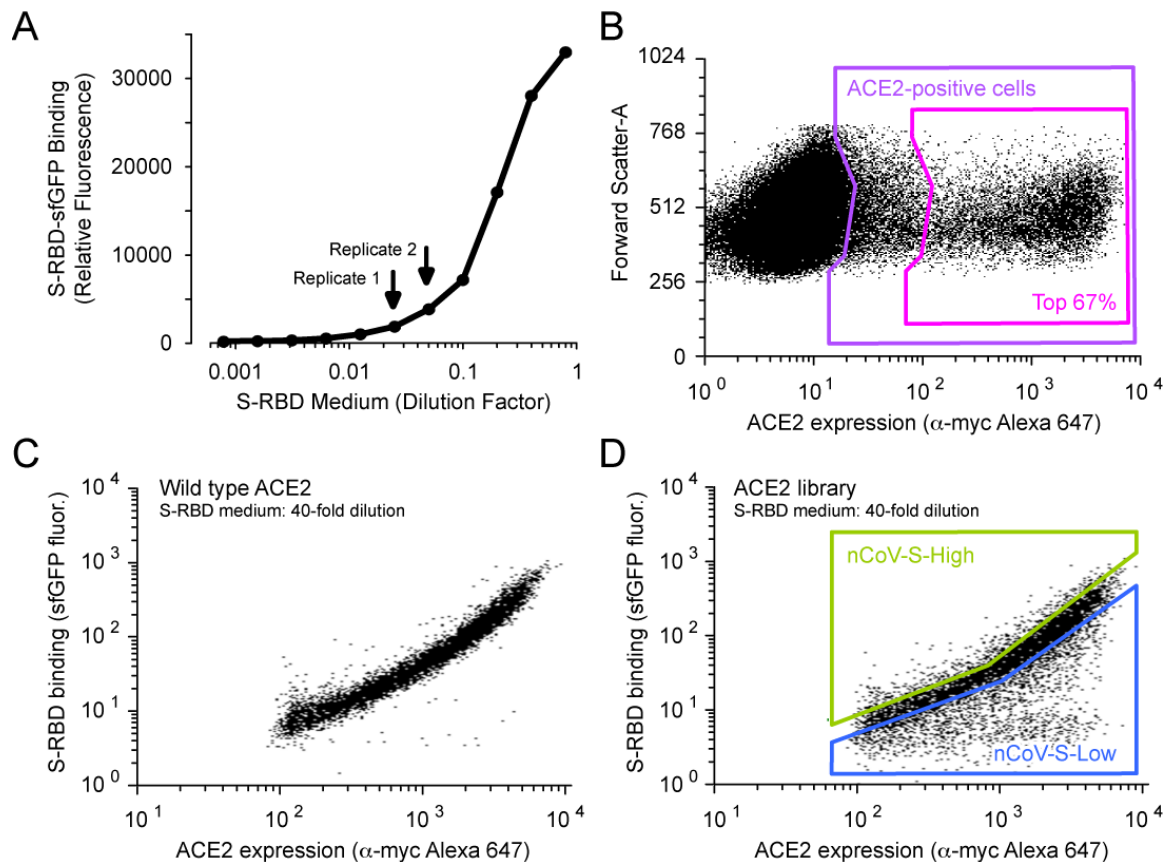

75

76 **Figure 1. A selection strategy for ACE2 variants with high binding to the RBD of SARS-**  
 77 **CoV-2 S.**

78 (A) Media from Expi293F cells secreting the SARS-CoV-2 RBD fused to sfGFP was collected  
 79 and incubated at different dilutions with Expi293F cells expressing myc-tagged ACE2. Bound  
 80 RBD-sfGFP was measured by flow cytometry. The dilutions of RBD-sfGFP-containing medium  
 81 used for FACS selections are indicated by arrows.

82 (B-C) Expi293F cells were transfected with wild type ACE2 plasmid diluted with a large excess  
 83 of carrier DNA. It has been previously shown that under these conditions, cells typically acquire  
 84 no more than one coding plasmid and most cells are negative. Cells were incubated with RBD-  
 85 sfGFP-containing medium and co-stained with fluorescent anti-myc to detect surface ACE2 by  
 86 flow cytometry. During analysis, the top 67% (magenta gate) were chosen from the ACE2-  
 87 positive population (purple gate) (B). Bound RBD was subsequently measured relative to  
 88 surface ACE2 expression (C).

89 (D) Expi293F cells were transfected with an ACE2 single site-saturation mutagenesis library and  
 90 analyzed as in B. During FACS, the top 15% of cells with bound RBD relative to ACE2  
 91 expression were collected (nCoV-S-High sort, green gate) and the bottom 20% were collected  
 92 separately (nCoV-S-Low sort, blue gate).

93 **Figure 2. A mutational landscape of ACE2 for high binding signal to the RBD of SARS-**  
 94 **CoV-2 S.**

95 Log<sub>2</sub> enrichment ratios from the nCoV-S-High sorts are plotted from ≤ -3 (i.e.  
 96 depleted/deleterious, orange) to neutral (white) to ≥ +3 (i.e. enriched, dark blue). ACE2 primary  
 97 structure is on the vertical axis, amino acid substitutions are on the horizontal axis. \*, stop  
 98 codon.

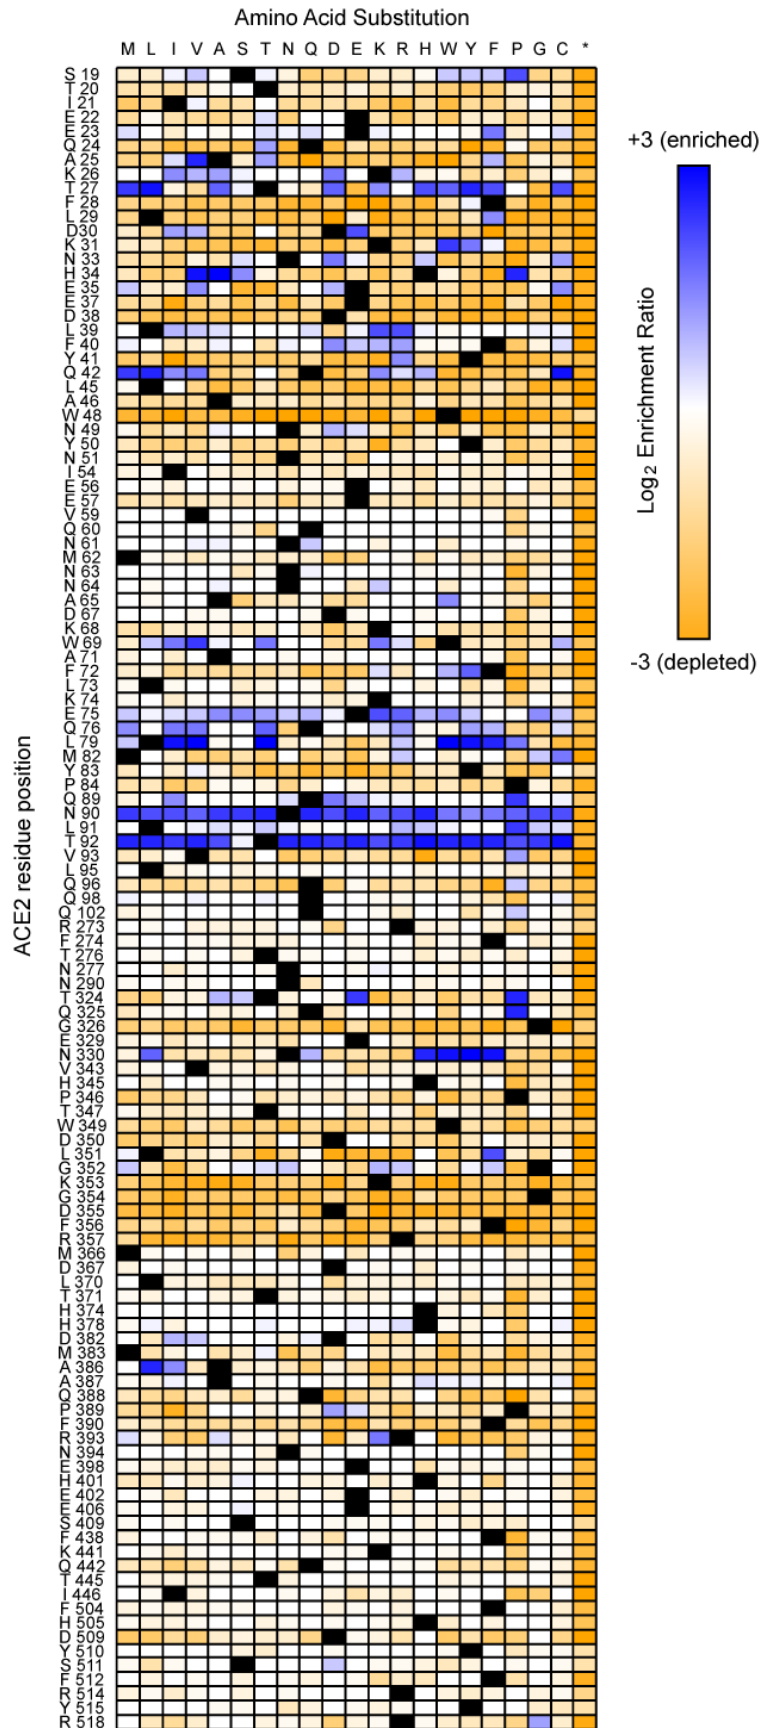

100 Transcripts in the sorted populations were deep sequenced, and frequencies of variants  
101 were compared to the naive plasmid library to calculate the enrichment or depletion of all  
102 2,340 coding mutations in the library (Fig. 2). This approach of tracking an *in vitro*  
103 selection or evolution by deep sequencing is known as deep mutagenesis (35). Enrichment  
104 ratios (Fig. 3A and 3B) and residue conservation scores (Fig. 3D and 3E) closely agree  
105 between two independent sort experiments, giving confidence in the data. For the most  
106 part, enrichment ratios (Fig. 3C) and conservation scores (Fig. 3F) in the nCoV-S-High sorts  
107 are anticorrelated with the nCoV-S-Low sorts, with the exception of nonsense mutations  
108 which were appropriately depleted from both gates. This indicates that most, but not all,  
109 nonsynonymous mutations in ACE2 did not eliminate surface expression. The library is  
110 biased towards solvent-exposed residues and has few substitutions of buried hydrophobics  
111 that might have bigger effects on plasma membrane trafficking (33).

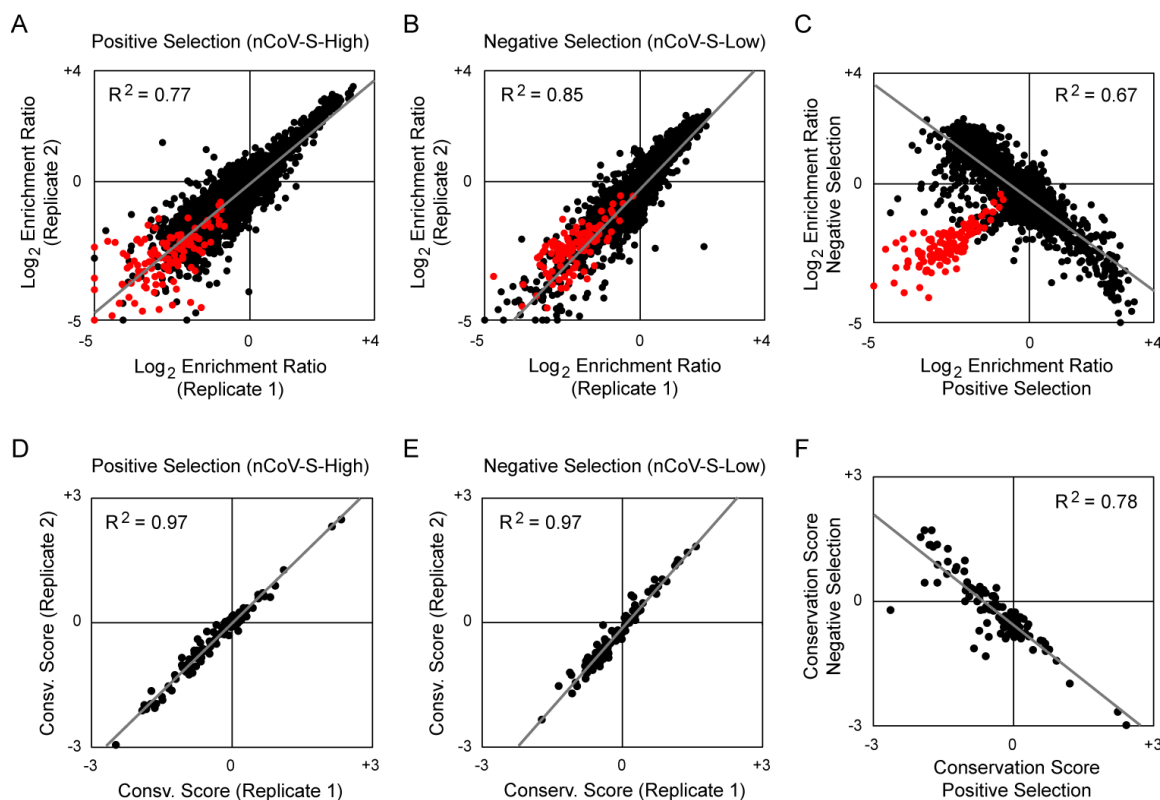

112

113 **Figure 3. Data from independent replicates show close agreement.**

114 (A-B) Log<sub>2</sub> enrichment ratios for ACE2 mutations in the nCoV-S-High (A) and nCoV-S-Low (B)  
115 sorts closely agree between two independent FACS experiments. Nonsynonymous mutations  
116 are black, nonsense mutations are red. Replicate 1 used a 1/40 dilution and replicate 2 used a  
117 1/20 dilution of RBD-sfGFP-containing medium. R<sup>2</sup> values are for nonsynonymous mutations.

118 (C) Average log<sub>2</sub> enrichment ratios tend to be anticorrelated between the nCoV-S-High and  
119 nCoV-S-Low sorts. Nonsense mutations (red) and a small number of nonsynonymous  
120 mutations (black) are not expressed at the plasma membrane and are depleted from both sort  
121 populations (i.e. fall below the diagonal).

122 (D-F) Correlation plots of residue conservation scores from replicate nCoV-S-High (D) and  
123 nCoV-S-Low (E) sorts, and from the averaged data from both nCoV-S-High sorts compared to

124 both nCoV-S-Low sorts (F). Conservation scores are calculated from the mean of the log<sub>2</sub>  
 125 enrichment ratios for all amino acid substitutions at each residue position.

126 Mapping the experimental conservation scores from the nCoV-S-High sorts to the structure  
 127 of RBD-bound ACE2 (19) shows that residues buried in the interface tend to be conserved,  
 128 whereas residues at the interface periphery or in the substrate-binding cleft are  
 129 mutationally tolerant (Fig. 4A). The region of ACE2 surrounding the C-terminal end of the  
 130 ACE2 α1 helix and β3-β4 strands has a weak tolerance of polar residues, while amino acids  
 131 at the N-terminal end of α1 and the C-terminal end of α2 prefer hydrophobics (Fig. 4B),  
 132 likely in part to preserve hydrophobic packing between α1-α2. These discrete patches  
 133 contact the globular RBD fold and a long protruding loop of the RBD, respectively.

134 Two ACE2 residues, N90 and T92 that together form a consensus N-glycosylation motif, are  
 135 notable hot spots for enriched mutations (Fig. 2 and 4A). Indeed, all substitutions of N90  
 136 and T92, with the exception of T92S which maintains the N-glycan, are highly favorable for  
 137 RBD binding, and the N90-glycan is thus predicted to partially hinder S/ACE2 interaction.

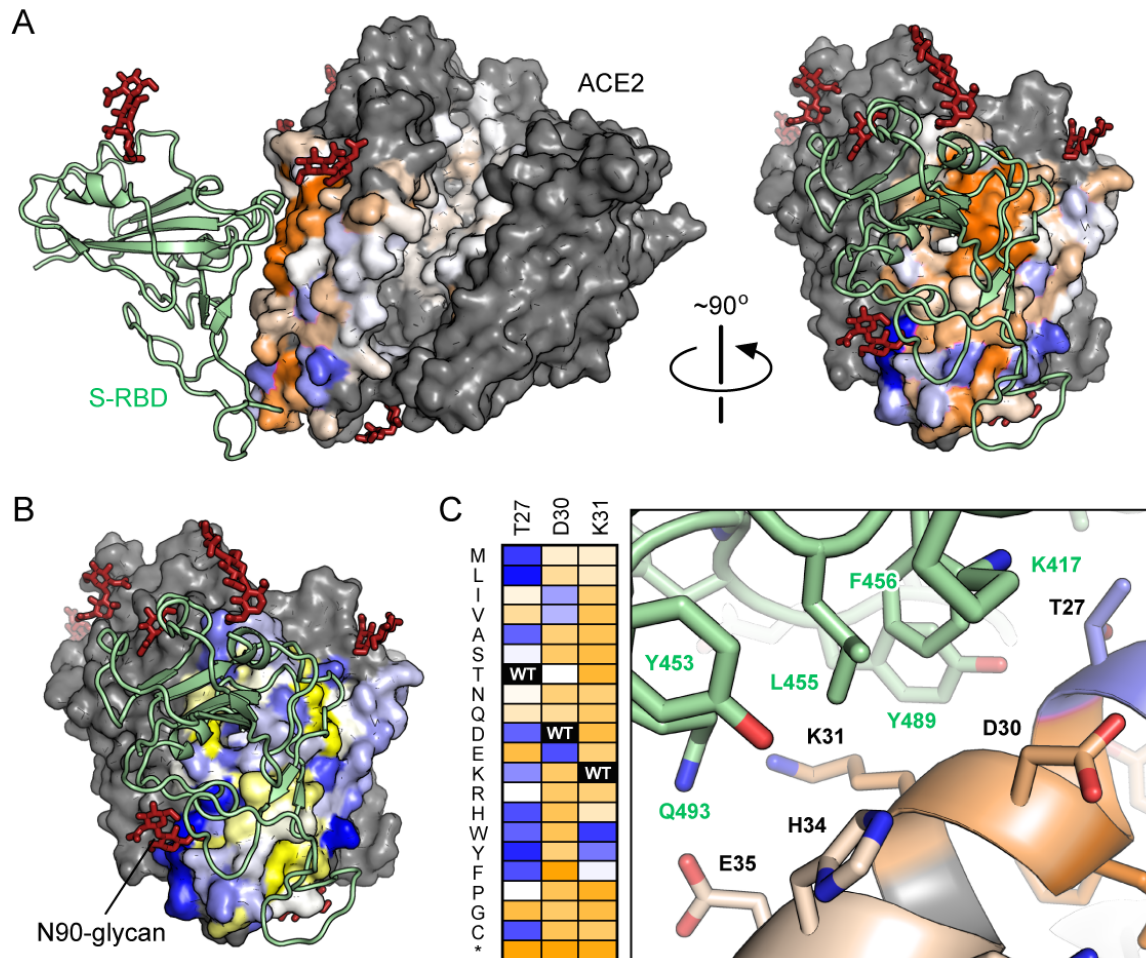

138

139 **Figure 4. Sequence preferences of ACE2 residues for high binding to the RBD of SARS-**  
 140 **CoV-2 S.**

141 **(A)** Conservation scores from the nCoV-S-High sorts are mapped to the cryo-EM structure  
142 (PDB 6M17) of RBD (pale green ribbon) bound ACE2 (surface). The view at left is looking  
143 down the substrate-binding cavity, and only a single protease domain is shown for clarity.  
144 Residues conserved for high RBD binding are orange; mutationally tolerant residues are pale  
145 colors; residues that are hot spots for enriched mutations are blue; and residues maintained as  
146 wild type in the ACE2 library are grey. Glycans are dark red sticks.

147 **(B)** Average hydrophobicity-weighted enrichment ratios are mapped to the RBD-bound ACE2  
148 structure, with residues tolerant of polar substitutions in blue, while residues that prefer  
149 hydrophobic amino acids are yellow.

150 **(C)** A magnified view of part of the ACE2 (colored by conservation score as in A) / RBD (pale  
151 green) interface. Accompanying heatmap plots  $\log_2$  enrichment ratios from the nCoV-S-High  
152 sort for substitutions of ACE2-T27, D30 and K31 from  $\leq -3$  (depleted) in orange to  $\geq +3$   
153 (enriched) in dark blue.

154 Mining the data identifies many ACE2 mutations that are enriched for RBD binding. For  
155 instance, there are 122 mutations to 35 positions in the library that have  $\log_2$  enrichment  
156 ratios  $>1.5$  in the nCoV-S-High sort. At least a dozen ACE2 mutations at the structurally  
157 characterized interface enhance RBD binding, and will be useful for engineering highly  
158 specific and tight binders of SARS-CoV-2 S. The molecular basis for how some of these  
159 mutations enhance RBD binding can be rationalized from the RBD-bound cryo-EM  
160 structure (Fig. 4C): hydrophobic substitutions of ACE2-T27 increase hydrophobic packing  
161 with aromatic residues of S, ACE2-D30E extends an acidic side chain to reach S-K417, and  
162 aromatic substitutions of ACE2-K31 contribute to an interfacial cluster of aromatics.  
163 However, engineered ACE2 receptors with mutations at the interface may present binding  
164 epitopes that are sufficiently different from native ACE2 that virus escape mutants can  
165 emerge, or they may be strain specific and lack breadth to bind S in future coronavirus  
166 outbreaks.

167 Instead, attention was drawn to mutations in the second shell and farther from the  
168 interface that do not directly contact S but instead have putative structural roles. For  
169 example, proline substitutions were enriched at five library positions (S19, L91, T92, T324  
170 and Q325) where they might entropically stabilize the first turns of helices. Proline was  
171 also enriched at H34, where it may enforce the central bulge in  $\alpha 1$ . Multiple mutations  
172 were also enriched at buried positions where they will change local packing (e.g. A25V,  
173 L29F, W69V, F72Y and L351F). The selection of ACE2 variants for high binding signal  
174 therefore not only reports on affinity, but also on presentation at the membrane of folded  
175 structure recognized by SARS-CoV-2 S. The presence of enriched structural mutations in  
176 the sequence landscape is especially notable considering the ACE2 library was biased  
177 towards solvent-exposed positions.

178 Thirty single substitutions highly enriched in the nCoV-S-High sort were validated by  
179 targeted mutagenesis (Fig. 5). Binding of RBD-sfGFP to full length ACE2 mutants increased  
180 compared to wild type, yet improvements were small and were most apparent on cells  
181 expressing low ACE2 levels (Fig. 5A). To rapidly assess mutations in a format more  
182 relevant to therapeutic development, the soluble ACE2 protease domain was fused to  
183 sfGFP. Expression levels of sACE2-sfGFP were qualitatively evaluated by fluorescence of  
184 the transfected cultures (Fig. 6A), and binding of sACE2-sfGFP to full length S expressed at

185 the plasma membrane was measured by flow cytometry (Fig. 6B). A single substitution  
186 (T92Q) that eliminates the N90 glycan gave a small increase in binding signal (Fig. 6B).  
187 Focusing on the most highly enriched substitutions in the selection for S binding that were  
188 also spatially segregated to minimize negative epistasis (36), combinations of mutations in  
189 sACE2 gave large increases in S binding (Table 1 and Fig. 6B). While this assay only  
190 provides relative differences, the combinatorial mutants have enhanced binding by at least  
191 an order of magnitude, which would give  $K_D$ s in the picomolar range based on the  
192 published  $K_D$  of wild type ACE2 with S (8, 10). Other combinations of mutations may have  
193 even greater effects. While monomeric sACE2 has been extensively studied *in vivo*  
194 (including in man) and is the most likely to advance first to clinical use, fusions of sACE2 to  
195 Fc of IgG or IgA classes may provide additional benefits of avidity, recruitment of immune  
196 effector functions, and secretion in to the respiratory mucosa. Plasmids for these fusions  
197 are deposited with Addgene.

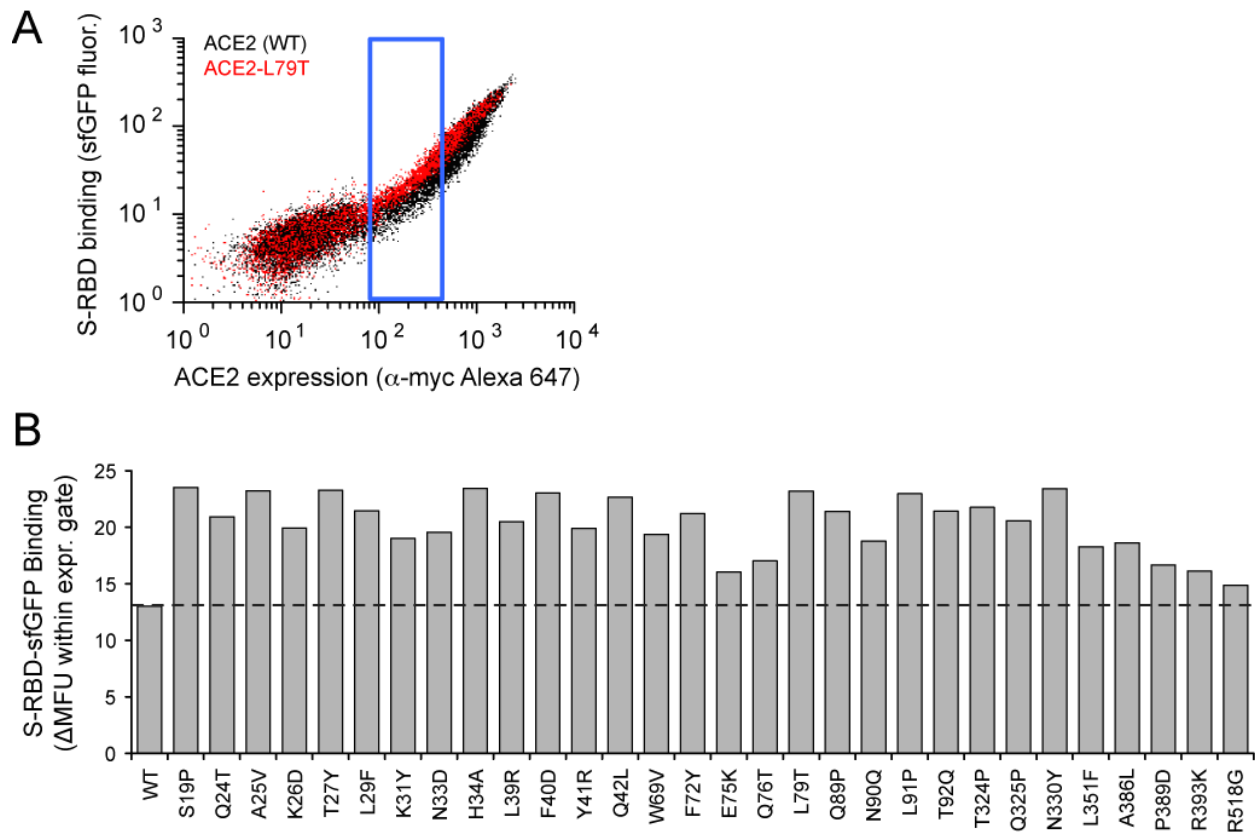

198

199 **Figure 5. Single amino acid substitutions in ACE2 predicted from the deep mutational**  
200 **scan to increase RBD binding have small effects.**

201 **(A)** Expi293F cells expressing full length ACE2 were stained with RBD-sfGFP-containing  
202 medium and analyzed by flow cytometry. Data are compared between wild type ACE2 (black)  
203 and a single mutant (L79T, red). Increased RBD binding is most discernable in cells expressing  
204 low levels of ACE2 (blue gate).

205 **(B)** RBD-sfGFP binding was measured for 30 single amino acid substitutions in ACE2. Data are  
206 GFP mean fluorescence in the low expression gate (blue box in panel A) with background  
207 fluorescence subtracted.



208

| Variant  | Mutations                                   |
|----------|---------------------------------------------|
| sACE2.v1 | H34A, T92Q, Q325P, A386L                    |
| sACE2.v2 | T27Y, L79T, N330Y, A386L                    |
| sACE2.v3 | A25V, T27Y, T92Q, Q325P, A386L              |
| sACE2.v4 | H34A, L79T, N330Y, A386L                    |
| sACE2.v5 | A25V, T92Q, A386L                           |
| sACE2.v6 | T27Y, Q42L, L79T, T92Q, Q325P, N330Y, A386L |

209

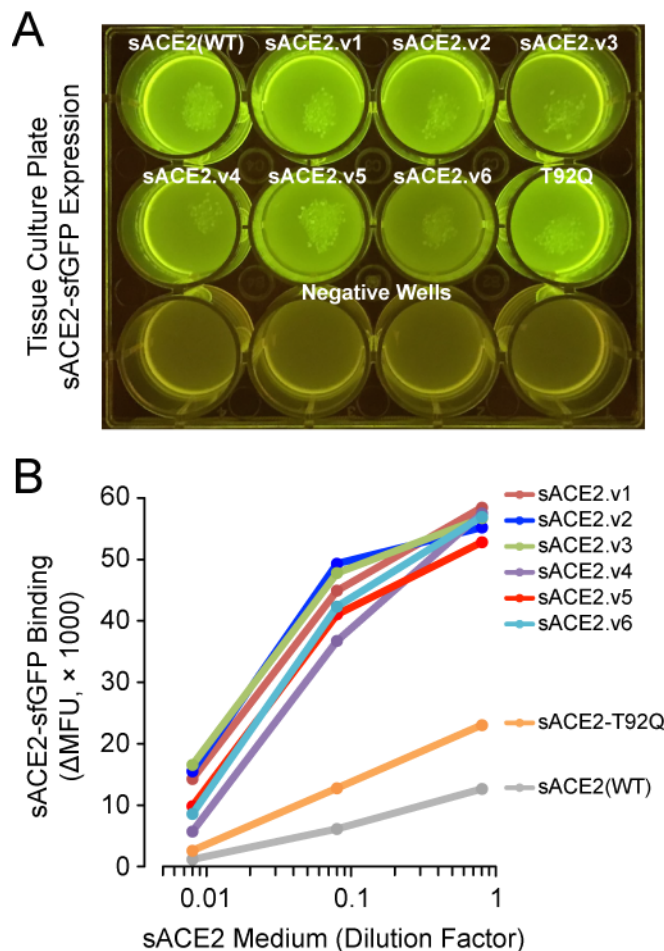

210

211 **Figure 6. Engineered sACE2 with enhanced binding to S.**

212 (A) Expression of sACE2-sfGFP mutants was qualitatively evaluated by fluorescence of the  
213 transfected cell cultures.

214 (B) Cells expressing full length S were stained with dilutions of sACE2-sfGFP-containing media  
215 and binding was analyzed by flow cytometry.

216 While deep mutagenesis of viral proteins in replicating viruses has been extensively  
217 pursued to understand escape mechanisms from drugs and antibodies, the work here

218 shows how deep mutagenesis can be directly applicable to therapeutic design when the  
219 selection method is decoupled from virus replication and focused on host factors.

## 220 **METHODS**

221 **Plasmids.** The mature polypeptide (a.a. 19-805) of human ACE2 (GenBank NM\_021804.1)  
222 was cloned in to the NheI-XhoI sites of pCEP4 (Invitrogen) with a N-terminal HA leader  
223 (MKTIIALSYIFCLVFA), myc-tag, and linker (GSPGGA). Soluble sACE2 fused to superfolder  
224 GFP (34) was constructed by genetically joining the protease domain (a.a. 1-615) of ACE2  
225 to sfGFP (GenBank ASL68970) via a gly/ser-rich linker (GSGGSGSGG), and pasting between  
226 the NheI-XhoI sites of pcDNA3.1(+) (Invitrogen). A synthetic human codon-optimized gene  
227 fragment (Integrated DNA Technologies) for the RBD (a.a. 333-529) of SARS-CoV-2 S  
228 (GenBank YP\_009724390.1) was N-terminally fused to a HA leader and C-terminally fused  
229 to superfolder GFP (34) and ligated in to the NheI-XhoI sites of pcDNA3.1(+). Human  
230 codon-optimized full length S (a.a. 16-1273) was subcloned from pUC57-2019-nCoV-  
231 S(Human) (Molecular Cloud) with a N-terminal HA leader (MKTIIALSYIFCLVFA), myc-tag,  
232 and linker (GSPGGA).

233 **Tissue Culture.** Expi293F cells (ThermoFisher) were cultured in Expi293 Expression  
234 Medium (ThermoFisher) at 125 rpm, 8 % CO<sub>2</sub>, 37 °C. For production of RBD-sfGFP, cells  
235 were prepared to 2 × 10<sup>6</sup> / ml. Per ml of culture, 500 ng of pcDNA3-RBD-sfGFP and 3 μg of  
236 polyethylenimine (MW 25,000; Polysciences) were mixed in 100 μl of OptiMEM (Gibco),  
237 incubated for 20 minutes at room temperature, and added to cells. Transfection Enhancers  
238 (ThermoFisher) were added 19 h post-transfection, and cells were cultured for 110 h. Cells  
239 were removed by centrifugation at 800 × g for 5 minutes and medium was stored at -20 °C.  
240 After thawing and immediately prior to use, remaining cell debris and precipitates were  
241 removed by centrifugation at 20,000 × g for 5 minutes. Soluble ACE2-sfGFP protein was  
242 produced by the same protocol with the following modifications: Transfection Enhancers  
243 were added 22<sup>-1/2</sup> h post-transfection, and medium supernatant was harvested after 60 h.

244 **Deep mutagenesis.** 117 residues within the protease domain of ACE2 were diversified by  
245 overlap extension PCR (37) using primers with degenerate NNK codons. The plasmid  
246 library was transfected in to Expi293F cells using Expifectamine under conditions  
247 previously shown to typically give no more than a single coding variant per cell (32, 33); 1  
248 ng coding plasmid was diluted with 1,500 ng pCEP4-ΔCMV carrier plasmid per ml of cell  
249 culture at 2 × 10<sup>6</sup> / ml, and the medium was replaced 2 h post-transfection. The cells were  
250 collected after 24 h, washed with ice-cold PBS supplemented with 0.2 % bovine serum  
251 albumin (PBS-BSA), and incubated for 30 minutes on ice with a 1/20 (replicate 1) or 1/40  
252 (replicate 2) dilution of medium containing RBD-sfGFP into PBS-BSA. Cells were co-stained  
253 with anti-myc Alexa 647 (clone 9B11, 1/250 dilution; Cell Signaling Technology). Cells  
254 were washed twice with PBS-BSA, and sorted on a BD FACS Aria II at the Roy J. Carver  
255 Biotechnology Center. The main cell population was gated by forward/side scattering to  
256 remove debris and doublets, and DAPI was added to the sample to exclude dead cells. Of  
257 the myc-positive (Alexa 647) population, the top 67% were gated (Fig. 1B). Of these, the 15  
258 % of cells with the highest and 20% of cells with the lowest GFP fluorescence were  
259 collected (Fig. 1D) in tubes coated overnight with fetal bovine serum and containing

260 Expi293 Expression Medium. Total RNA was extracted from the collected cells using a  
261 GeneJET RNA purification kit (Thermo Scientific), and cDNA was reverse transcribed with  
262 high fidelity Accuscript (Agilent) primed with gene-specific oligonucleotides. Diversified  
263 regions of ACE2 were PCR amplified as 5 fragments. Flanking sequences on the primers  
264 added adapters to the ends of the products for annealing to Illumina sequencing primers,  
265 unique barcoding, and for binding the flow cell. Amplicons were sequenced on an Illumina  
266 NovaSeq 6000 using a 2×250 nt paired end protocol. Data were analyzed using Enrich (38),  
267 and commands are provided in the GEO deposit. Briefly, the frequencies of ACE2 variants in  
268 the transcripts of the sorted populations were compared to their frequencies in the naive  
269 plasmid library to calculate an enrichment ratio.

270 **Flow Cytometry Analysis of ACE2-S Binding.** Expi293F cells were transfected with  
271 pcDNA3-myc-ACE2 or pcDNA3-myc-S plasmids (500 ng DNA per ml of culture at  $2 \times 10^6$  /  
272 ml) using Expifectamine (ThermoFisher). Cells were analyzed by flow cytometry 24 h  
273 post-transfection. To analyze binding of RBD-sfGFP to full length myc-ACE2, cells were  
274 washed with ice-cold PBS-BSA, and incubated for 30 minutes on ice with a 1/30 dilution of  
275 medium containing RBD-sfGFP and a 1/240 dilution of anti-myc Alexa 647 (clone 9B11,  
276 Cell Signaling Technology). Cells were washed twice with PBS-BSA and analyzed on a BD  
277 LSR II. To analyze binding of sACE2-sfGFP to full length myc-S, cells were washed with  
278 PBS-BSA, and incubated for 30 minutes on ice with a serial dilution of medium containing  
279 sACE2-sfGFP and a 1/240 dilution of anti-myc Alexa 647 (clone 9B11, Cell Signaling  
280 Technology). Cells were washed twice with PBS-BSA and analyzed on a BD Accuri C6. Data  
281 were processed with FCS Express (De Novo Software)

282 **Reagent and data availability.** Plasmids are deposited with Addgene under IDs 141183-5  
283 and 145145-78. Raw and processed deep sequencing data are deposited in NCBI's Gene  
284 Expression Omnibus (GEO) with series accession no. GSE147194.

285 **ACKNOWLEDGEMENTS.** Staff at the UIUC Roy J. Carver Biotechnology Center assisted with  
286 FACS and Illumina sequencing. Hannah Choi assisted with plasmid preparation. The  
287 development of deep mutagenesis to study virus-receptor interactions was supported by  
288 NIH award R01AI129719.

289 **CONFLICT OF INTEREST STATEMENT.** E.P. is the inventor on a provisional patent filing  
290 by the University of Illinois covering aspects of this work. E.P. is a cofounder of Orthogonal  
291 Biologics, Inc.

## 292 REFERENCES

- 293 1. N. Zhu *et al.*, A Novel Coronavirus from Patients with Pneumonia in China, 2019. *N.*  
294 *Engl. J. Med.* **382**, 727–733 (2020).
- 295 2. P. Zhou *et al.*, A pneumonia outbreak associated with a new coronavirus of probable  
296 bat origin. *Nature.* **579**, 270–273 (2020).
- 297 3. J. S. M. Peiris *et al.*, Coronavirus as a possible cause of severe acute respiratory  
298 syndrome. *Lancet.* **361**, 1319–1325 (2003).

- 299 4. Coronaviridae Study Group of the International Committee on Taxonomy of Viruses,  
300 The species Severe acute respiratory syndrome-related coronavirus: classifying  
301 2019-nCoV and naming it SARS-CoV-2. *Nat Microbiol.* **4**, 3 (2020).
- 302 5. A. Patel, D. B. Jernigan, 2019-nCoV CDC Response Team, Initial Public Health  
303 Response and Interim Clinical Guidance for the 2019 Novel Coronavirus Outbreak -  
304 United States, December 31, 2019-February 4, 2020. *MMWR Morb. Mortal. Wkly. Rep.*  
305 **69**, 140–146 (2020).
- 306 6. W. Wang, J. Tang, F. Wei, Updated understanding of the outbreak of 2019 novel  
307 coronavirus (2019-nCoV) in Wuhan, China. *J. Med. Virol.* **92**, 441–447 (2020).
- 308 7. C. Huang *et al.*, Clinical features of patients infected with 2019 novel coronavirus in  
309 Wuhan, China. *Lancet.* **395**, 497–506 (2020).
- 310 8. A. C. Walls *et al.*, Structure, Function, and Antigenicity of the SARS-CoV-2 Spike  
311 Glycoprotein. *Cell* (2020), doi:10.1016/j.cell.2020.02.058.
- 312 9. Y. Wan, J. Shang, R. Graham, R. S. Baric, F. Li, Receptor recognition by novel  
313 coronavirus from Wuhan: An analysis based on decade-long structural studies of  
314 SARS. *J. Virol.* (2020), doi:10.1128/JVI.00127-20.
- 315 10. D. Wrapp *et al.*, Cryo-EM structure of the 2019-nCoV spike in the prefusion  
316 conformation. *Science*, eabb2507 (2020).
- 317 11. M. Hoffmann *et al.*, SARS-CoV-2 Cell Entry Depends on ACE2 and TMPRSS2 and Is  
318 Blocked by a Clinically Proven Protease Inhibitor. *Cell* (2020),  
319 doi:10.1016/j.cell.2020.02.052.
- 320 12. W. Li *et al.*, Angiotensin-converting enzyme 2 is a functional receptor for the SARS  
321 coronavirus. *Nature.* **426**, 450–454 (2003).
- 322 13. M. Letko, A. Marzi, V. Munster, Functional assessment of cell entry and receptor  
323 usage for SARS-CoV-2 and other lineage B betacoronaviruses. *Nat Microbiol.* **11**, 1860  
324 (2020).
- 325 14. M. A. Tortorici, D. Veessler, Structural insights into coronavirus entry. *Adv. Virus Res.*  
326 **105**, 93–116 (2019).
- 327 15. S. K. Wong, W. Li, M. J. Moore, H. Choe, M. Farzan, A 193-amino acid fragment of the  
328 SARS coronavirus S protein efficiently binds angiotensin-converting enzyme 2. *J. Biol.*  
329 *Chem.* **279**, 3197–3201 (2004).
- 330 16. I. G. Madu, S. L. Roth, S. Belouzard, G. R. Whittaker, Characterization of a highly  
331 conserved domain within the severe acute respiratory syndrome coronavirus spike  
332 protein S2 domain with characteristics of a viral fusion peptide. *J. Virol.* **83**, 7411–  
333 7421 (2009).

- 334 17. A. C. Walls *et al.*, Tectonic conformational changes of a coronavirus spike  
335 glycoprotein promote membrane fusion. *Proc. Natl. Acad. Sci. U.S.A.* **114**, 11157–  
336 11162 (2017).
- 337 18. J. K. Millet, G. R. Whittaker, Host cell entry of Middle East respiratory syndrome  
338 coronavirus after two-step, furin-mediated activation of the spike protein. *Proc. Natl.*  
339 *Acad. Sci. U.S.A.* **111**, 15214–15219 (2014).
- 340 19. R. Yan *et al.*, Structural basis for the recognition of the SARS-CoV-2 by full-length  
341 human ACE2. *Science*, eabb2762 (2020).
- 342 20. F. Li, W. Li, M. Farzan, S. C. Harrison, Structure of SARS coronavirus spike receptor-  
343 binding domain complexed with receptor. *Science*. **309**, 1864–1868 (2005).
- 344 21. H. Hofmann *et al.*, Susceptibility to SARS coronavirus S protein-driven infection  
345 correlates with expression of angiotensin converting enzyme 2 and infection can be  
346 blocked by soluble receptor. *Biochem. Biophys. Res. Commun.* **319**, 1216–1221  
347 (2004).
- 348 22. C. Lei *et al.*, Potent neutralization of 2019 novel coronavirus by recombinant ACE2-Ig.  
349 *bioRxiv*, 2020.02.01.929976 (2020).
- 350 23. M. J. Moore *et al.*, Retroviruses pseudotyped with the severe acute respiratory  
351 syndrome coronavirus spike protein efficiently infect cells expressing angiotensin-  
352 converting enzyme 2. *J. Virol.* **78**, 10628–10635 (2004).
- 353 24. V. Monteil *et al.*, Inhibition of SARS-CoV-2 infections in engineered human tissues  
354 using clinical-grade soluble human ACE2. *Cell*. DOI: **10.1016/j.cell.2020.04.004**, 1–  
355 28 (2020).
- 356 25. P. Liu *et al.*, Novel ACE2-Fc chimeric fusion provides long-lasting hypertension  
357 control and organ protection in mouse models of systemic renin angiotensin system  
358 activation. *Kidney Int.* **94**, 114–125 (2018).
- 359 26. M. Haschke *et al.*, Pharmacokinetics and pharmacodynamics of recombinant human  
360 angiotensin-converting enzyme 2 in healthy human subjects. *Clin Pharmacokinet.* **52**,  
361 783–792 (2013).
- 362 27. A. Khan *et al.*, A pilot clinical trial of recombinant human angiotensin-converting  
363 enzyme 2 in acute respiratory distress syndrome. *Crit Care.* **21**, 234 (2017).
- 364 28. G. Zhang, S. Pomplun, A. R. Loftis, A. Loas, B. L. Pentelute, The first-in-class peptide  
365 binder to the SARS-CoV-2 spike protein. *bioRxiv*, 2020.03.19.999318 (2020).
- 366 29. P. Towler *et al.*, ACE2 X-ray structures reveal a large hinge-bending motion  
367 important for inhibitor binding and catalysis. *J. Biol. Chem.* **279**, 17996–18007  
368 (2004).

- 369 30. R. L. Kruse, Therapeutic strategies in an outbreak scenario to treat the novel  
370 coronavirus originating in Wuhan, China. *F1000Res.* **9**, 72 (2020).
- 371 31. H. Zhang, J. M. Penninger, Y. Li, N. Zhong, A. S. Slutsky, Angiotensin-converting  
372 enzyme 2 (ACE2) as a SARS-CoV-2 receptor: molecular mechanisms and potential  
373 therapeutic target. *Intensive Care Med.* **309**, 1864 (2020).
- 374 32. J. D. Heredia *et al.*, Mapping Interaction Sites on Human Chemokine Receptors by  
375 Deep Mutational Scanning. *J. Immunol.* **200**, ji1800343–3839 (2018).
- 376 33. J. Park *et al.*, Structural architecture of a dimeric class C GPCR based on co-trafficking  
377 of sweet taste receptor subunits. *Journal of Biological Chemistry.* **294**, 4759–4774  
378 (2019).
- 379 34. J.-D. Pédelacq, S. Cabantous, T. Tran, T. C. Terwilliger, G. S. Waldo, Engineering and  
380 characterization of a superfolder green fluorescent protein. *Nat. Biotechnol.* **24**, 79–  
381 88 (2006).
- 382 35. D. M. Fowler, S. Fields, Deep mutational scanning: a new style of protein science. *Nat.*  
383 *Methods.* **11**, 801–807 (2014).
- 384 36. J. D. Heredia, J. Park, H. Choi, K. S. Gill, E. Procko, Conformational Engineering of HIV-  
385 1 Env Based on Mutational Tolerance in the CD4 and PG16 Bound States. *J. Virol.* **93**,  
386 e00219–19 (2019).
- 387 37. E. Procko *et al.*, Computational design of a protein-based enzyme inhibitor. *J. Mol.*  
388 *Biol.* **425**, 3563–3575 (2013).
- 389 38. D. M. Fowler, C. L. Araya, W. Gerard, S. Fields, Enrich: software for analysis of protein  
390 function by enrichment and depletion of variants. *Bioinformatics.* **27**, 3430–3431  
391 (2011).
- 392
